# Supplementary material for: Direct Quantitation of SARS-CoV-2 Using Droplet Digital PCR in Suspected Samples With Very Low Viral Load
Source: Preprints.org preprint supplement (doi:10.20944/preprints202104.0688.v1), 2021-04-26
Supplement: Supplementary file 1 [file supplementary]

| **Patient** | **Sex** | **Comorbidities**  **(numbers)** | **Comborbity 1** | **Comborbity 2** | **Comborbity 3** | **Comborbity 4** | **Comborbity 5** | **Comborbity 6** | **Drugs** |
| --- | --- | --- | --- | --- | --- | --- | --- | --- | --- |
| HP1 | F | 4 | Hypertension | Thyroid disease | Osteoarthrosis | Dementia | na | na | na |
| HP2 | M | 2 | Post traumatic tetraplegy | Atrioventricolar block | Diabetes mellitus type 2 | Prostatic hypertrophy | na | na | Hydroxychloroquine |
| HP3 | M | 3 | Hypertension | Hypertensive heart cardiopathy | Depressive syndrome | na | na | na | na |
| HP4 | M | 3 | Past chronic osteomyelitis | Prostatic hypertrophy | Digestive blooding | na | na | na | Hydroxychloroquine |
| HP5a | M | 1 | Post traumatic vegetative state | na | na | na | na | na | Azithromycin + Hydroxychloroquine |
| HP5b | M | 1 | Post traumatic vegetative state | na | na | na | na | na | Azithromycin + Hydroxychloroquine |
| HP6 | F | > 5 | Hypertension | Hypertensive heart cardiopathy | Sjogren's syndrome | Fibromyalgia | Gastroesophageal reflux disease | Crystal artropathy | Hydroxychloroquine+ Darunavir/cobicistat |
| HP7 | M | 1 | Past meningioma exeresis | na | na | na | na | na | Darunavir/ritonavir + Hydroxychloroquine |
| HP8 | F | 1 | Diabetes mellitus type 2 | na | na | na | na | na | Lopinavir/Ritonavir |
| HP9 | F | 1 | Obesity | na | na | na | na | na | na |
| HP10 | F | 1 | Past lung thromboembolism | na | na | na | na | na | Hydroxychloroquine |
| HP11 | F | 1 | Past cerebral hemorrhage | Thyroid disease | na | na | na | na | Hydroxychloroquine |
| HP12 | M | 1 | Past cerebral hemorrhage | Hypertension | na | na | na | na | na |
| HP13 | M | 3 | Post myelitis paraplegia | Chronic hcv hepatitis | na | na | na | na | na |
| HP14 | F | 3 | Diabetes mellitus type 2 | Spondilolistesis | Thyroid disease | na | na | na | Clarithromycin + Hydroxychloroquine + Darunavir/cobicistat |
| HP15 | M | > 5 | Ischemic heart disease | Prostatic neoplasia | Hypertension | na | na | na | Hydroxychloroquine |
| HP16 | M | 0 | na | na | na | na | na | na | Hydroxychloroquine+ Darunavir/cobicistat |
| HP17 | M | 2 | Past lung tubercolosi | Renal lithiasis | na | na | na | na | Hydroxychloroquine+ Darunavir/cobicistat |
| HP18 | F | 2 | Concomitant ischemic ictus | Chronic vascular encephalopaty | na | na | na | na | Hydroxychloroquine |
| HP19 | M | 0 | na | na | na | na | na | na | na |

Table 1S. Comorbidities and treatment in hospitalized patients. Na: not applicable.
